# Supplementary material for: Cell loaded 3D bioprinted GelMA hydrogels for corneal stroma engineering
Source: Royal Society of Chemistry journal article supplement (doi:10.1039/c9bm01236b), 2019-11-04
Supplement: c9bm01236b1.pdf [file c9bm01236b1.pdf]

## Supplementary Data

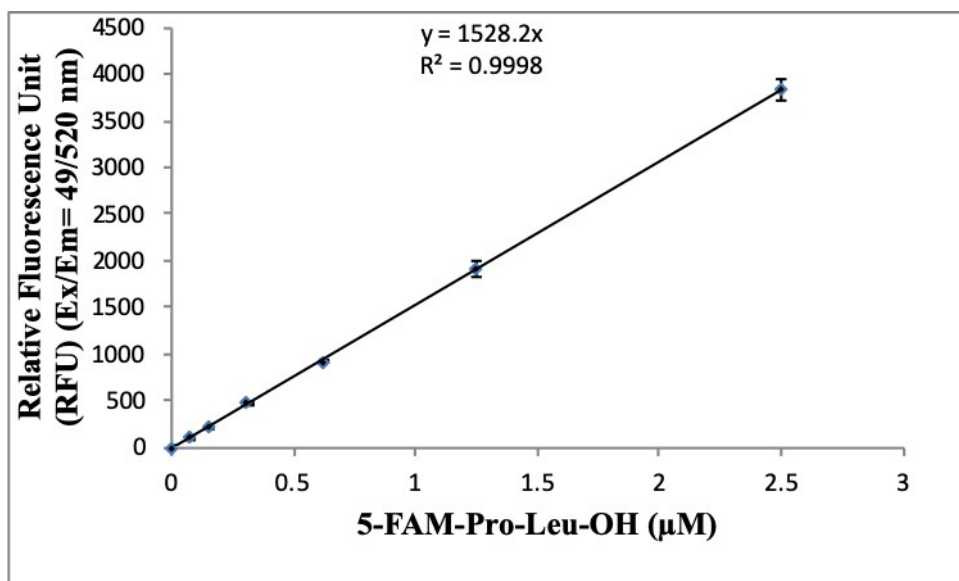

Figure S1: Calibration curve for MMP activity using 5-FAM-Pro-Leu-OH as substrate.

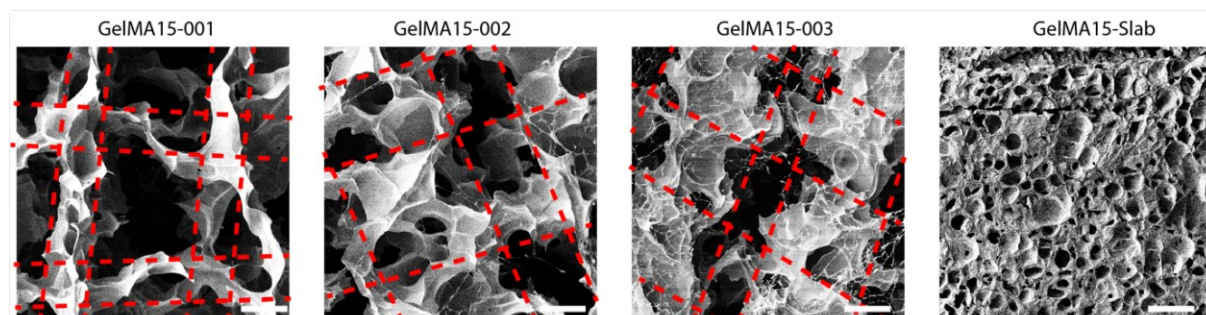

Figure S2: SEM micrographs of 3D printed and slab GelMA hydrogels in lyophilized form. Red dotted lines are the outlines of the printed GelMA. Scale bar: 250 µm.

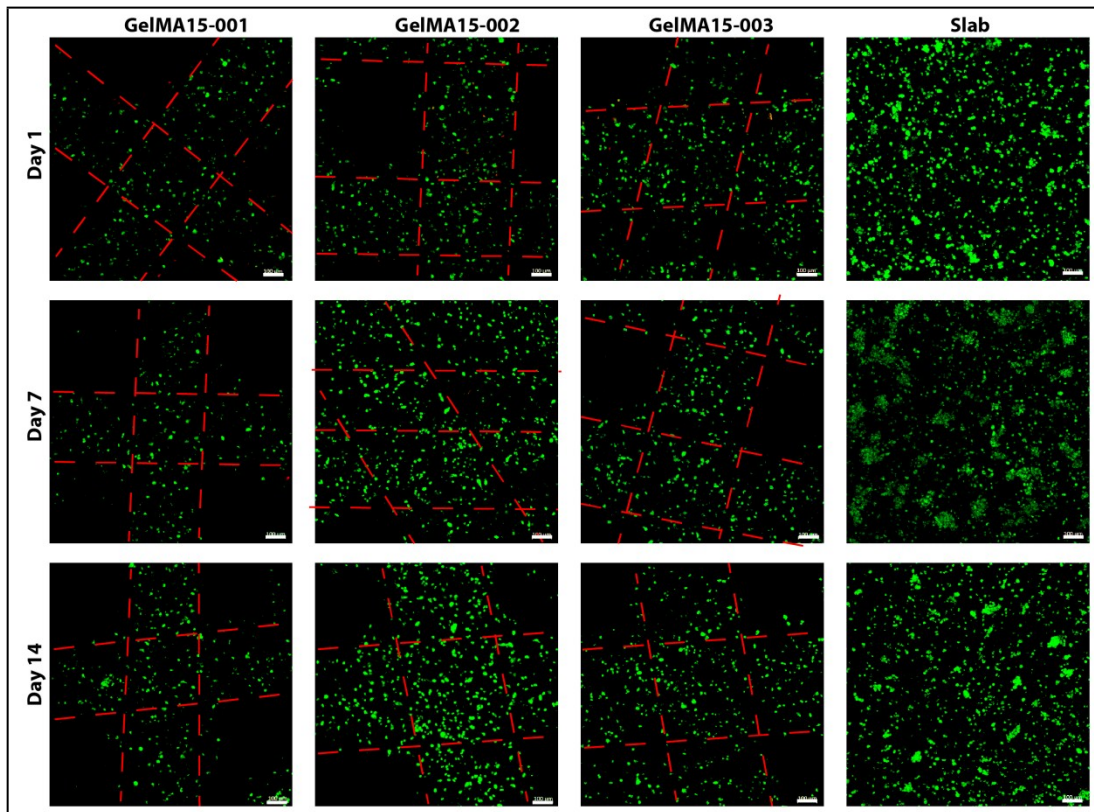

Figure S3: CLSM images showing results of Live-Dead Cell Viability Assay of 3D printed and slab GelMA hydrogels on Day 1, 7, and 14. A) Live-Dead assay with red showing dead (ethidium homodimer-1) and green showing live cells (calcein). Scale bars: 100  $\mu\text{m}$ . Dotted red lines indicate the fiber borders.

Table S1: Transmittance (%) (at 300 and 700 nm) of cell loaded (w/ cells) and cell free (w/o cells) 3D printed hydrogels and also slab hydrogels for upto 21 days of incubation.

| Wavelength (nm) | Time (Days) | GelMA15-001 |           | GelMA15-002 |           | GelMA15-003 |           | GelMA15-Slab |           |
|-----------------|-------------|-------------|-----------|-------------|-----------|-------------|-----------|--------------|-----------|
|                 |             | w cells     | w/o cells | w cells     | w/o cells | w cells     | w/o cells | w cells      | w/o cells |
| 300             | 1           | 20.2        | 29.3      | 19.3        | 17.1      | 17.2        | 5.1       | 0.1          | 2.0       |
|                 | 7           | 18.8        | 11.3      | 4.1         | 19.7      | 22.4        | 9.7       | 4.0          | 0.6       |
|                 | 14          | 17.9        | 17.9      | 10.1        | 5.0       | 9.9         | 14.4      | 1.5          | 0.5       |
|                 | 21          | 19.2        | 37.0      | 10.7        | 5.4       | 12.0        | 16.7      | 6.0          | 3.8       |
| 700             | 1           | 86.7        | 92.9      | 89.2        | 89.4      | 88.6        | 87.5      | 75.3         | 91.4      |
|                 | 7           | 90.5        | 88.4      | 84.9        | 90.4      | 91.2        | 87.8      | 80.3         | 79.9      |
|                 | 14          | 90.5        | 90.5      | 84.8        | 88.3      | 86.7        | 92.0      | 81.7         | 79.4      |
|                 | 21          | 88.2        | 90.9      | 84.3        | 83.7      | 83.9        | 88.5      | 83.0         | 79.0      |
